# Supplementary material
Source: PubMed Central journal article supplement (PMC10061312)
Supplement: jamapsychiatry-e230131-s001.pdf [file jamapsychiatry-e230131-s001.pdf]

## Supplemental Online Content

Mesbah R, Koenders MA, Van der Wee NJA, Giltay EJ, van Hemert AM, de Leeuw M. Association between the fronto-limbic network and cognitive and emotional functioning in individuals with bipolar disorder: a systematic review and meta-analysis. *JAMA Psychiatry*. Published online March 29, 2023.  
doi:10.1001/jamapsychiatry.2023.0131

**eMethods.** Literature search

**eTable 1.** PRISMA 2020 Checklist

**eFigure.** PRISMA Flow chart

**eTable 2.** Descriptives of included fMRI studies

**eReferences**

This supplemental material has been provided by the authors to give readers additional information about their work.

## **eMethods. Literature search**

The literature search included all the fMRI studies on BD before March 2020. An independent employee of the Walaeus Library (Leiden University Libraries) performed the literature search. The authors screened first for eligibility based on titles and abstracts according to the inclusion and exclusion criteria. When this was unclear, the full-text review was carried out. The full-text of the remaining studies was beside the authors reviewed independently by two interns in the field of psychology. Disagreements were managed by discussion to reach a consensus.

We used the following key words (using both free-text and MeSH search):

```
("fMRI"[tw] OR "f mri"[tw] OR fmr imag*[tw] OR functional magnetic*[tw] OR "functional magnetic resonance imaging"[tw] OR "functional mri"[tw] OR "functional mr"[tw] OR ("Magnetic Resonance Imaging"[mesh] AND "functional"[tw]) OR ("Magnetic Resonance Imaging"[mesh] OR MR imag*[tw] OR "MRI"[tw] OR "magnetic resonance"[tw])) AND ("Functional Neuroimaging"[Mesh:noexp] OR functional imag*[tw] OR functional neuroimag*[tw])) AND ("Bipolar Disorder"[Mesh] OR "Bipolar and Related Disorders"[Mesh] OR "Bipolar Disorder"[tw] OR "Bipolar Disorders"[tw] OR "Manic-Depressive Psychosis"[tw] OR "Manic Depressive Psychosis"[tw] OR "Bipolar Affective Psychosis"[tw] OR "Manic-Depressive Psychoses"[tw] OR "Mania"[tw] OR "Manias"[tw] OR "Manic State"[tw] OR "Manic States"[tw] OR "Bipolar Depression"[tw] OR "Manic Disorder"[tw] OR "Manic Disorders"[tw] OR "manic depressive"[tw] OR "manic"[tw] OR Bipolar affectiv*[tw] OR Bipolar disease*[tw] OR Bipolar disorder*[tw] OR bipolar depress*[tw]) NOT ("Animals"[mesh] NOT "Humans"[mesh])
```

**eTable 1. PRISMA 2020 Checklist**

| Section and Topic             | Item # | Checklist item                                                                                                                                                                                                                                                                                       | Location where item is reported              |
|-------------------------------|--------|------------------------------------------------------------------------------------------------------------------------------------------------------------------------------------------------------------------------------------------------------------------------------------------------------|----------------------------------------------|
| <b>TITLE</b>                  |        |                                                                                                                                                                                                                                                                                                      |                                              |
| Title                         | 1      | Identify the report as a systematic review.                                                                                                                                                                                                                                                          | It is reported as meta-analysis in the title |
| <b>ABSTRACT</b>               |        |                                                                                                                                                                                                                                                                                                      |                                              |
| Abstract                      | 2      | See the PRISMA 2020 for Abstracts checklist.                                                                                                                                                                                                                                                         | See abstract                                 |
| <b>INTRODUCTION</b>           |        |                                                                                                                                                                                                                                                                                                      |                                              |
| Rationale                     | 3      | Describe the rationale for the review in the context of existing knowledge.                                                                                                                                                                                                                          | 4-5                                          |
| Objectives                    | 4      | Provide an explicit statement of the objective(s) or question(s) the review addresses.                                                                                                                                                                                                               | 4-5                                          |
| <b>METHODS</b>                |        |                                                                                                                                                                                                                                                                                                      |                                              |
| Eligibility criteria          | 5      | Specify the inclusion and exclusion criteria for the review and how studies were grouped for the syntheses.                                                                                                                                                                                          | 6                                            |
| Information sources           | 6      | Specify all databases, registers, websites, organisations, reference lists and other sources searched or consulted to identify studies. Specify the date when each source was last searched or consulted.                                                                                            | See Appendix                                 |
| Search strategy               | 7      | Present the full search strategies for all databases, registers and websites, including any filters and limits used.                                                                                                                                                                                 | See Appendix                                 |
| Selection process             | 8      | Specify the methods used to decide whether a study met the inclusion criteria of the review, including how many reviewers screened each record and each report retrieved, whether they worked independently, and if applicable, details of automation tools used in the process.                     | See Appendix                                 |
| Data collection process       | 9      | Specify the methods used to collect data from reports, including how many reviewers collected data from each report, whether they worked independently, any processes for obtaining or confirming data from study investigators, and if applicable, details of automation tools used in the process. | See Appendix                                 |
| Data items                    | 10a    | List and define all outcomes for which data were sought. Specify whether all results that were compatible with each outcome domain in each study were sought (e.g. for all measures, time points, analyses), and if not, the methods used to decide which results to collect.                        | 6-7                                          |
|                               | 10b    | List and define all other variables for which data were sought (e.g. participant and intervention characteristics, funding sources). Describe any assumptions made about any missing or unclear information.                                                                                         | 6-7                                          |
| Study risk of bias assessment | 11     | Specify the methods used to assess risk of bias in the included studies, including details of the tool(s) used, how many reviewers assessed each study and whether they worked independently, and if applicable, details of automation tools used in the process.                                    | N/A                                          |
| Effect measures               | 12     | Specify for each outcome the effect measure(s) (e.g. risk ratio, mean difference) used in the synthesis or presentation of results.                                                                                                                                                                  | N/A                                          |

| Section and Topic             | Item # | Checklist item                                                                                                                                                                                                                                                                       | Location where item is reported |
|-------------------------------|--------|--------------------------------------------------------------------------------------------------------------------------------------------------------------------------------------------------------------------------------------------------------------------------------------|---------------------------------|
| Synthesis methods             | 13a    | Describe the processes used to decide which studies were eligible for each synthesis (e.g. tabulating the study intervention characteristics and comparing against the planned groups for each synthesis (item #5)).                                                                 | 6                               |
|                               | 13b    | Describe any methods required to prepare the data for presentation or synthesis, such as handling of missing summary statistics, or data conversions.                                                                                                                                | N/A                             |
|                               | 13c    | Describe any methods used to tabulate or visually display results of individual studies and syntheses.                                                                                                                                                                               |                                 |
|                               | 13d    | Describe any methods used to synthesize results and provide a rationale for the choice(s). If meta-analysis was performed, describe the model(s), method(s) to identify the presence and extent of statistical heterogeneity, and software package(s) used.                          | 6-7                             |
|                               | 13e    | Describe any methods used to explore possible causes of heterogeneity among study results (e.g. subgroup analysis, meta-regression).                                                                                                                                                 | N/A                             |
|                               | 13f    | Describe any sensitivity analyses conducted to assess robustness of the synthesized results.                                                                                                                                                                                         | N/A                             |
| Reporting bias assessment     | 14     | Describe any methods used to assess risk of bias due to missing results in a synthesis (arising from reporting biases).                                                                                                                                                              | N/A                             |
| Certainty assessment          | 15     | Describe any methods used to assess certainty (or confidence) in the body of evidence for an outcome.                                                                                                                                                                                | N/A                             |
| <b>RESULTS</b>                |        |                                                                                                                                                                                                                                                                                      |                                 |
| Study selection               | 16a    | Describe the results of the search and selection process, from the number of records identified in the search to the number of studies included in the review, ideally using a flow diagram.                                                                                         | Figure 1                        |
|                               | 16b    | Cite studies that might appear to meet the inclusion criteria, but which were excluded, and explain why they were excluded.                                                                                                                                                          | Figure 1                        |
| Study characteristics         | 17     | Cite each included study and present its characteristics.                                                                                                                                                                                                                            | Table 1                         |
| Risk of bias in studies       | 18     | Present assessments of risk of bias for each included study.                                                                                                                                                                                                                         | N/A                             |
| Results of individual studies | 19     | For all outcomes, present, for each study: (a) summary statistics for each group (where appropriate) and (b) an effect estimate and its precision (e.g. confidence/credible interval), ideally using structured tables or plots.                                                     | Table 3 and 4                   |
| Results of syntheses          | 20a    | For each synthesis, briefly summarise the characteristics and risk of bias among contributing studies.                                                                                                                                                                               | N/A                             |
|                               | 20b    | Present results of all statistical syntheses conducted. If meta-analysis was done, present for each the summary estimate and its precision (e.g. confidence/credible interval) and measures of statistical heterogeneity. If comparing groups, describe the direction of the effect. | Table 2 and 3                   |
|                               | 20c    | Present results of all investigations of possible causes of heterogeneity among study results.                                                                                                                                                                                       | N/A                             |
|                               | 20d    | Present results of all sensitivity analyses conducted to assess the robustness of the synthesized results.                                                                                                                                                                           | 8-9                             |
| Reporting biases              | 21     | Present assessments of risk of bias due to missing results (arising from reporting biases) for each synthesis assessed.                                                                                                                                                              | N/A                             |
| Certainty of evidence         | 22     | Present assessments of certainty (or confidence) in the body of evidence for each outcome assessed.                                                                                                                                                                                  | 8-9                             |

| Section and Topic                              | Item # | Checklist item                                                                                                                                                                                                                             | Location where item is reported   |
|------------------------------------------------|--------|--------------------------------------------------------------------------------------------------------------------------------------------------------------------------------------------------------------------------------------------|-----------------------------------|
| <b>DISCUSSION</b>                              |        |                                                                                                                                                                                                                                            |                                   |
| Discussion                                     | 23a    | Provide a general interpretation of the results in the context of other evidence.                                                                                                                                                          | 10                                |
|                                                | 23b    | Discuss any limitations of the evidence included in the review.                                                                                                                                                                            | 10-14                             |
|                                                | 23c    | Discuss any limitations of the review processes used.                                                                                                                                                                                      | 13                                |
|                                                | 23d    | Discuss implications of the results for practice, policy, and future research.                                                                                                                                                             | 13                                |
| <b>OTHER INFORMATION</b>                       |        |                                                                                                                                                                                                                                            |                                   |
| Registration and protocol                      | 24a    | Provide registration information for the review, including register name and registration number, or state that the review was not registered.                                                                                             | the review was not registered     |
|                                                | 24b    | Indicate where the review protocol can be accessed, or state that a protocol was not prepared.                                                                                                                                             | Protocols of BrainMap* were used. |
|                                                | 24c    | Describe and explain any amendments to information provided at registration or in the protocol.                                                                                                                                            | N/A                               |
| Support                                        | 25     | Describe sources of financial or non-financial support for the review, and the role of the funders or sponsors in the review.                                                                                                              | N/A                               |
| Competing interests                            | 26     | Declare any competing interests of review authors.                                                                                                                                                                                         | 15                                |
| Availability of data, code and other materials | 27     | Report which of the following are publicly available and where they can be found: template data collection forms; data extracted from included studies; data used for all analyses; analytic code; any other materials used in the review. | 15                                |

From: Page MJ, McKenzie JE, Bossuyt PM, Boutron I, Hoffmann TC, Mulrow CD, et al. The PRISMA 2020 statement: an updated guideline for reporting systematic reviews. *BMJ* 2021;372:n71. doi: 10.1136/bmj.n71

For more information, visit: <http://www.prisma-statement.org/>

\* Fox PT, Lancaster JL. Mapping context and content: The BrainMap model. *Nature Rev Neurosci* 3, 319-321, 2002.

Eickhoff SB, Laird AR, Grefkes C, Wang LE, Zilles K, Fox PT. Coordinate-based activation likelihood estimation meta-analysis of neuroimaging data: A random-effects approach based on empirical estimates of spatial uncertainty. *Hum Brain Mapp* 30, 2907-2926, 2009.

**eFigure 1. PRISMA Flow chart**

PRISMA flow chart of the literature search for included studies.

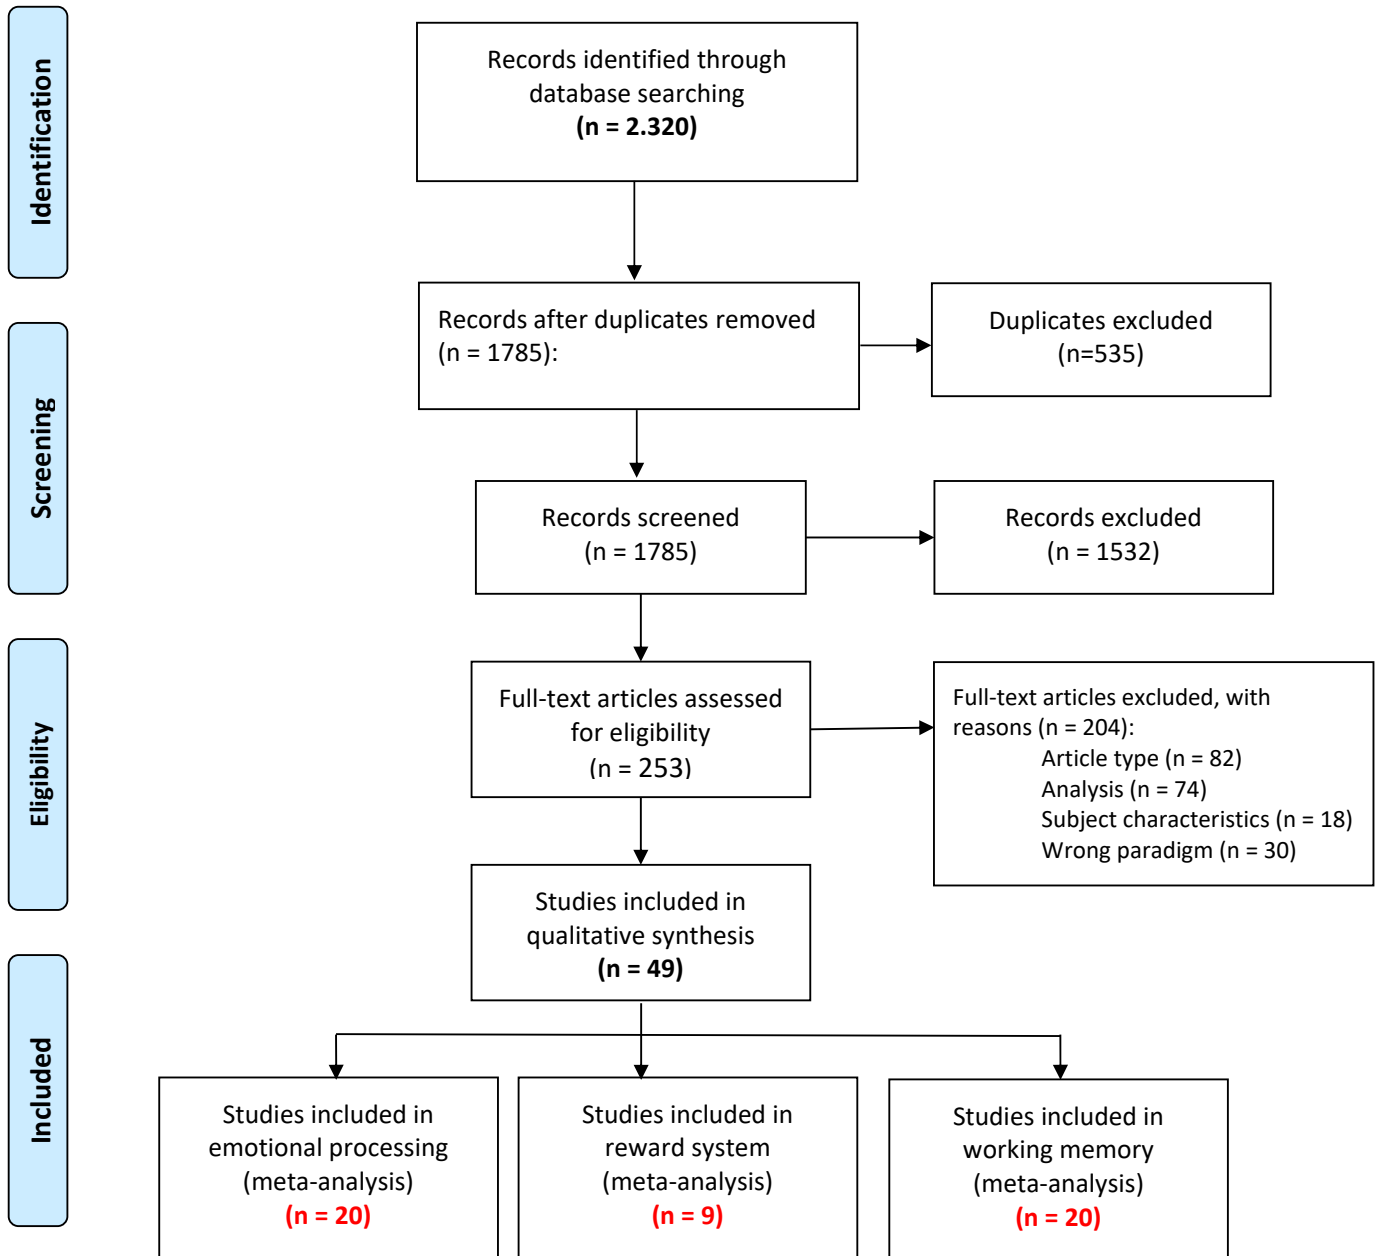

**eTable 2. Descriptives of included fMRI studies of three domains of emotion processing, reward processing and working memory in the meta-analysis using a whole-brain approach. A total of 46 papers has been used including 49 fMRI studies.**

| Emotion Tasks                                   |                             |                          |                    |                            | Mood states       | Medication                                                                   | Task                      |                                                                                  |
|-------------------------------------------------|-----------------------------|--------------------------|--------------------|----------------------------|-------------------|------------------------------------------------------------------------------|---------------------------|----------------------------------------------------------------------------------|
|                                                 | BD patients (n) (female, %) | BD type I or II (n)      | HC (n) (female, %) | BD patients (mean age, SD) | HC (mean age, SD) | Mood Stabilizers (n)<br>Antipsychotics (n)<br>Antidepressants (n)            |                           |                                                                                  |
| (Cerullo et al. 2014) <sup>1</sup>              | 25, 68%                     | BD I (25)                | 25, 67%            | 30.0 (8.0)                 | 26.0 (7.0)        | Depressed (n = 25)                                                           | Unmedicated (25)          | Modified continuous performance task emotional and neutral distracters (CPT-END) |
| (Mitchell et al. 2004) <sup>2</sup>             | 11, 0%                      | BD NS (11)               | 13, 0%             | 42.8 (1.8)                 | 32,2 (3.6)        | Not specified (n = 11)                                                       | MS (9), AP (4), AD (5)    | Emotional prosody task                                                           |
| (Wessa et al. 2007) <sup>3</sup>                | 17, 41%                     | BD I (10),<br>BD II (7)  | 17, 35%            | 44.9 (12.7)                | 44.9 (13.4)       | Euthymic (n = 17)                                                            | MS (7), AP (8)            | Affective go/no-go task                                                          |
| (Whalley et al. 2009) <sup>4</sup>              | 14, 29%                     | BD I (14)                | 14, 26%            | 35.4 (8.4)                 | 38.4 (10.0)       | Not specified (n = 14)                                                       | MS (4), AP (8), AD (3)    | Emotional memory task                                                            |
| (Young, Bodurka, and Drevets 2016) <sup>5</sup> | 16, 88%                     | BD I (16)                | 16, 88%            | 37.6 (9.3)                 | 37.8 (8.7)        | Depressed (n = 16)                                                           | Unmedicated (16)          | Emotional autobiographical memory task                                           |
| (Morris et al. 2012) <sup>6</sup>               | 13, 38%                     | BD I (13)                | 15, 60%            | 41.0 (3.0)                 | 35.0 (2.0)        | Euthymic (n = 6)<br>Hypomanic (n = 5)<br>Not specified (n = 2)               | AP (5), AD (6)            | Emotion regulation task                                                          |
| (Zhang et al. 2020) <sup>7</sup>                | 15, 33%                     | BD I (13),<br>BD II (2)  | 15, 60%            | 39.9 (12.5)                | 33.6 (11.1)       | Depressed (n = 2)<br>Not specified (n = 13)                                  | AP (15), AD (9)           | Emotion regulation task                                                          |
| (Han et al. 2018) <sup>8</sup>                  | 10, 40%                     | BD I (10)                | 10, 40%            | 38.6 (9.4)                 | 31.8 (8.0)        | Euthymic (n = 10)                                                            | MS (10), AD (8)           | Emotional picture task                                                           |
| (Moser et al. 2018) <sup>9</sup>                | 37, 32%                     | BD I (37)                | 48, 42%            | 27.5 (8.1)                 | 29.8 (8.5)        | Not specified (n = 27)                                                       | MS (15), AP (30), AD (7)  | Emotion recognition task                                                         |
| (Kryza-Lacombe et al. 2019) <sup>10</sup>       | 33, 78%                     | BD I (21),<br>BD II (11) | 22, 55%            | 38.2 (11.1)                | 29.4 (7.2)        | Depressed (n = 8)<br>Hypomanic (n = 4)<br>Mixed (n = 1)<br>Euthymic (n = 44) | MS (29), AP (18), AD (15) | Face emotion labelling task                                                      |
| (Elliott et al. 2004) <sup>11</sup>             | 8, 50%                      | BD I (7),<br>BD II (1)   | 11, 73%            | 35.0 (-)                   | 37.6 (9.7)        | Manic (n = 8)                                                                | MS (7), AP (5)            | Affective go/no-go task                                                          |
| (Foland et al. 2008) <sup>12</sup>              | 9, 66%                      | BD I (9)                 | 9, 66%             | 34.6 (8.0)                 | 30.4 (7.6)        | Manic (n = 9)                                                                | MS (8), AP (1)            | Face emotion labelling task                                                      |
| (Lennox et al. 2004) <sup>13</sup>              | 10, 20%                     | BD I (10)                | 12, 50%            | 37.3 (12.8)                | 32.6 (10.7)       | Manic (n = 10)                                                               | MS (10), AP (8)           | Face emotion labelling task                                                      |
| (Malhi et al. 2007) <sup>14</sup>               | 10, 100 %                   | BD I (10)                | 10, 100%           | 33.5 (8.7)                 | 33.6 (6.4)        | Euthymic (n = 10)                                                            | MS (7)                    | Explicit facial emotion recognition task                                         |

|                                                          |             |                          |             |                                              |              |                                                     |                                            |                                             |
|----------------------------------------------------------|-------------|--------------------------|-------------|----------------------------------------------|--------------|-----------------------------------------------------|--------------------------------------------|---------------------------------------------|
| (Altshuler et al. 2008) <sup>15</sup>                    | 11, 54%     | BD I (11)                | 17, 47%     | 32.0 (7.3)                                   | 29.5 (6.6)   | Depressed (n = 11)                                  | MS (8), AP (2), AD (3)                     | Face-matching task                          |
| (Chen et al. 2006) <sup>16</sup>                         | 16, 19%     | BD I (16)                | 8, 75%      | Manic = 39 (13.4)<br>Depressed = 41.9 (12.1) | 38.75 (12.5) | Manic (n = 8)<br>Depressed (n = 8)                  | MS (16), AP (6), AD (2)                    | Explicit and implicit face recognition task |
| (Jogia et al. 2008) <sup>17</sup>                        | 12, 58%     | BD I (12)                | 12, 58%     | 42.1 (11.8)                                  | 41.8 (10.9)  | Not specified (n = 12)                              | MS (12)                                    | Sad affect face recognition task            |
| (Hassel et al. 2008) <sup>18</sup>                       | 19, 52%     | BD I (19)                | 24, 54%     | 32.5 (8.8)                                   | 27.7 (8.7)   | Euthymic (n = 19)                                   | MS (12), AP (14), AD (9)                   | Facial expression task                      |
| (Killgore, Gruber, and Yurgelun-Todd 2008) <sup>19</sup> | 14, 21%     | BD NS (14)               | 13, 8%      | 28.1 (11.2)                                  | 25.5 (4.7)   | Not specified (n = 14)                              | MS (5), AP (12), AD (1)                    | Fearful face perception task                |
| (Lagopoulos and Malhi 2007) <sup>20</sup>                | 10, 100%    | BD I (10)                | 10, 100%    | 33.6 (8.12)                                  | 33.6 (6.7)   | Euthymic (n = 10)                                   | MS (7)                                     | Emotional Stroop task                       |
| <b>Reward Tasks</b>                                      |             |                          |             |                                              |              |                                                     |                                            |                                             |
| (Abler et al. 2008) <sup>21</sup>                        | 12, 41.7%   | BD I (12)                | 12, 41.7%   | 33.9 (11.2)                                  | 36.2 (11.2)  | Manic (n = 8)<br>Mixed (n = 3)<br>Hypomanic (n = 1) | MS (12)                                    | Monetary incentive task                     |
| (Caseras et al. 2013) <sup>22</sup>                      | 32, 59%     | BD I (17),<br>BD II (15) | 20, 65%     | 42.3 (6.0)                                   | 41.6 (7.7)   | Hypomanic (n = 1)<br>Euthymic (n = 31)              | MS (22), AP (12), AD (12)                  | Monetary reward processing task             |
| (Chase et al. 2013) <sup>23</sup>                        | 23, 82%     | BD I (23)                | 37, 67%     | 33.9 (8.5)                                   | 33.1 (6.2)   | Depressed (n = 25)                                  | MS (13), AP (11), AD (9)                   | Card number guessing task                   |
| (Frangou et al. 2008) <sup>24</sup>                      | 7, 71%      | BD I (7)                 | 7, 71%      | 37.0 (5.9)                                   | 39.0 (5.9)   | Euthymic (n = 7)                                    | MS (7)                                     | Gambling task                               |
| (Jogia et al. 2012) <sup>25</sup>                        | 36, 53%     | BD I (36)                | 37, 43%     | 42.5 (10.6)                                  | 37.6 (11.3)  | Euthymic (n = 36)                                   | Unmedicated (14)<br>A (21), AP (6), AD (7) | Iowa gambling task                          |
| (Kirschner et al. 2019) <sup>26</sup>                    | 25, 36%     | BD I (25)                | 25, 36%     | 37.3 (9.1)                                   | 33.1 (9.7)   | Euthymic (n = 25)                                   | MS (18), AP (18), AD (7)                   | Monetary incentive delayed task             |
| (Manelis et al. 2019) <sup>27</sup>                      | 34, 85%     | BD I (34)                | 17, 59%     | 35.1 (1.3)                                   | 31.4 (1.5)   | Depressed (n = 16)<br>Euthymic (n = 18)             | MS (10), AP (19), AD (15)                  | Card number guessing task                   |
| (Mason et al. 2014) <sup>28</sup>                        | 20, 50%     | BD I (18),<br>BD II (2)  | 20, 55%     | 36.0 (4.3)                                   | 33.25 (9.3)  | Euthymic (n = 20)                                   | MS (8)                                     | Roulette task                               |
| (Sharma et al. 2016) <sup>29</sup>                       | 24, 58%     |                          | 30, 55%     | 38.0 (11.7)                                  | 39.4 (11.8)  | Depressed (n = 24)                                  | MS (11), AP (11), AD (6)                   | Monetary reward procedure                   |
| <b>Working Memory Tasks</b>                              |             |                          |             |                                              |              |                                                     |                                            |                                             |
| (Adler et al. 2004) <sup>30</sup>                        | 15, unknown | BD I (15)                | 15, unknown | 29.0 (9.0)                                   | 30.0 (9.0)   | Euthymic (n = 15)                                   | Unmedicated (4)<br>Unknown (11)            | Letter n-back task                          |
| (Brooks et al. 2015) <sup>31</sup>                       | 19, 42%     | BD II (19)               | 19, 52%     | 36.7 (11.4)                                  | 42.6 (12.0)  | Depressed (n = 19)                                  | Unmedicated (19)                           | Letter n-back task                          |
| (Deckersbach et al. 2008) <sup>32</sup>                  | 9, 100%     | BD I (9)                 | 17, 100%    | 27.6 (2.8)                                   | 25.6 (5.9)   | Depressed (n = 9)                                   | MS (9)                                     | Letter n-back task (with mood induction)    |
| (Drapier et al. 2008) <sup>33</sup>                      | 20, 45%     | BD I (20)                | 20, 50%     | 42.7 (10.4)                                  | 41.9 (11.6)  | Euthymic (n = 20)                                   | MS (16), AP (4), AD (2)                    | Letter n-back tasks                         |
| (Fernández-Corcuera et al. 2013) <sup>34</sup>           | 41, 45%     | BD NS (41)               | 41, 41%     | 40.4 (10.2)                                  | 40.3 (9.8)   | Depressed (n = 41)                                  | Unmedicated (41)                           | Letter n-back task                          |



|                                                       |          |                          |          |             |             |                                                            |                                             |                                         |
|-------------------------------------------------------|----------|--------------------------|----------|-------------|-------------|------------------------------------------------------------|---------------------------------------------|-----------------------------------------|
| (Frangou et al. 2008) <sup>24</sup>                   | 7, 71%   | BD I (7)                 | 7, 71%   | 37.0 (5.9)  | 39.0 (5.9)  | Euthymic (n = 7)                                           | MS (7)                                      | Letter n-back task                      |
| (Gruber et al. 2010) <sup>35</sup>                    | 18, 44%  | BD I (18)                | 18, 61%  | 38.2 (9.9)  | 33.9 (11.5) | Euthymic (n = 18)                                          | Unmedicated (3)<br>MS (12), AP (3), AD (6)  | Verbal delayed-match-to-sample task     |
| (Hamilton et al. 2009) <sup>36</sup>                  | 21, 38%  | BD I (21)                | 38, 39%  | 36.4 (10.7) | 32.5 (11.7) | Euthymic (n = 21)                                          |                                             | Delayed match to sample task            |
| (Jogia et al. 2012) <sup>25</sup>                     | 36, 53%  | BD I (36)                | 37, 43%  | 42.5 (10.6) | 37.6 (11.3) | Euthymic (n = 36)                                          | Unmedicated (14)<br>MS (21), AP (6), AD (7) | Letter n-back task                      |
| (Lagopoulos, Ivanovski, and Malhi 2007) <sup>37</sup> | 10, 100% | BD I (10)                | 10, 100% | 32.4 (10.8) | 31.7 (11.9) | Euthymic (n = 10)                                          | MS (7)                                      | Delay-response memory task              |
| (McKenna et al. 2014) <sup>38</sup>                   | 23, 65%  | BD I (23)                | 23, 65%  | 45.3 (9.5)  | 44.8 (10.6) | Euthymic (n = 23)                                          | MS (17), AP (12), AD (11)                   | Pseudoword delayed match to sample task |
| (Monks et al. 2004) <sup>39</sup>                     | 12, 100% | BD I (12)                | 12, 100% | 45.8 (3.5)  | 45.6 (3.5)  | Euthymic (n = 12)                                          | MS (12)                                     | Letter n-back task<br>Sternberg task    |
| (Pomarol-Clotet et al. 2012) <sup>40</sup>            | 29, 37%  | BD I (29)                | 46, 41%  | 49.8 (12.1) | 36.3 (13.6) | Manic (n = 29)                                             | MS (23), AP (24)                            | Letter n-back task                      |
| (Pomarol-Clotet et al. 2015) <sup>41</sup>            | 114, 54% | BD I (108),<br>BD II (6) | 38, 52%  | 39.9 (10.2) | 39.7 (8.9)  | Manic (n = 38)<br>Depressed (n = 38)<br>Euthymic (n = 38)  | MS (95), AP (69), AD (32)                   | Letter n-back task                      |
| (Robinson et al. 2009) <sup>42</sup>                  | 15, 53%  | BD I (15)                | 15, 47%  | 39.0 (12.6) | 36.2 (10.6) | Euthymic (n = 15)                                          | MS (8), AP (7), AD (12)                     | Delayed-non-match-to-sample task        |
| (Wu et al. 2014) <sup>43</sup>                        | 20, 52%  | BD I (20)                | 29, 50%  | 27.9 (6.4)  | 22.7 (5.1)  | Not specified (n = 20)                                     | MS (18), AP (7), AD (12)                    | Letter n-back task                      |
| (Rodríguez-Cano et al. 2017) <sup>44</sup>            | 26, 61%  | BD I (26)                | 26, 61%  | 45.6 (9.2)  | 46.8 (11.2) | Depressed (n = 26)                                         | MS (23), AP (14), AD (15)                   | Letter n-back task                      |
| (Moser et al. 2018) <sup>9</sup>                      | 37, 32%  | BD I (37)                | 48, 42%  | 27.5 (8.1)  | 29.8 (8.5)  | Not specified (n = 37)                                     | MS (15), AP (30), AD (7)                    | Various stimuli n-back task             |
| (Goikolea et al. 2019) <sup>45</sup>                  | 31, 48%  | BD (31)                  | 31, 48%  | 30.5 (9.1)  | 31.1 (8.8)  | Manic (n = 31)                                             | MS (22), AP (31)                            | Letter n-back task                      |
| (Alonso-Lana et al. 2019) <sup>46</sup>               | 26, 42%  | BD I (26)                | 26, 42%  | 39.2 (12.3) | 40.2 (11.0) | Manic (baseline) (n = 26)<br>Euthymic (follow-up) (n = 26) | MS (19), AP (22), AD (2)                    | Letter n-back task                      |

NS = Not Specified, MS = Mood Stabilizers, AP = Antipsychotics, AD = Antidepressants.

## eReferences

1. Cerullo MA, Eliassen JC, Smith CT, et al. Bipolar I disorder and major depressive disorder show similar brain activation during depression. *Bipolar Disord*. 2014;16(7):703-712.
2. Mitchell RLC, Elliott R, Barry M, Cruttenden A, Woodruff PWR. Neural response to emotional prosody in schizophrenia and in bipolar affective disorder. *Br J Psychiatry*. 2004;184:223-230.
3. Wessa M, Houenou J, Paillère-Martinot ML, et al. Fronto-striatal overactivation in euthymic bipolar patients during an emotional go/nogo task. *Am J Psychiatry*. 2007;164(4):638-646.
4. Whalley HC, McKirdy J, Romaniuk L, et al. Functional imaging of emotional memory in bipolar disorder and schizophrenia. *Bipolar Disord*. 2009;11(8):840-856.
5. Young KD, Bodurka J, Drevets WC. Differential neural correlates of autobiographical memory recall in bipolar and unipolar depression. *Bipolar Disord*. 2016;18(7):571-582.
6. Morris RW, Sparks A, Mitchell PB, Weickert CS, Green MJ. Lack of cortico-limbic coupling in bipolar disorder and schizophrenia during emotion regulation. *Transl Psychiatry*. 2012;2:e90.
7. Zhang L, Ai H, Opmeer EM, et al. Distinct temporal brain dynamics in bipolar disorder and schizophrenia during emotion regulation. *Psychol Med*. 2020;50(3):413-421.
8. Han X, Liu X, Li L, et al. Neural Activation During Tonic Pain and Interaction Between Pain and Emotion in Bipolar Disorder: An fMRI Study. *Front Psychiatry*. 2018;9:555.
9. Moser DA, Doucet GE, Lee WH, et al. Multivariate Associations Among Behavioral, Clinical, and Multimodal Imaging Phenotypes in Patients With Psychosis. *JAMA Psychiatry*. 2018;75(4):386-395.
10. Kryza-Lacombe M, Brotman MA, Reynolds RC, et al. Neural mechanisms of face emotion processing in youths and adults with bipolar disorder. *Bipolar Disord*. 2019;21(4):309-320.
11. Elliott R, Ogilvie A, Rubinsztein JS, Calderon G, Dolan RJ, Sahakian BJ. Abnormal ventral frontal response during performance of an affective go/no go task in patients with mania. *Biol Psychiatry*. 2004;55(12):1163-1170.
12. Foland LC, Altshuler LL, Bookheimer SY, Eisenberger N, Townsend J, Thompson PM. Evidence for deficient modulation of amygdala response by prefrontal cortex in bipolar mania. *Psychiatry Res*. 2008;162(1):27-37.
13. Lennox BR, Jacob R, Calder AJ, Lupson V, Bullmore ET. Behavioural and neurocognitive responses to sad facial affect are attenuated in patients with mania. *Psychol Med*. 2004;34(5):795-802.
14. Malhi GS, Lagopoulos J, Sachdev PS, Ivanovski B, Shnier R, Ketter T. Is a lack of disgust something to fear? A functional magnetic resonance imaging facial emotion recognition study in euthymic bipolar disorder patients. *Bipolar Disord*. 2007;9(4):345-357.
15. Altshuler L, Bookheimer S, Townsend J, et al. Regional brain changes in bipolar I depression: a functional magnetic resonance imaging study. *Bipolar Disord*. 2008;10(6):708-717.

16. Chen CH, Lennox B, Jacob R, et al. Explicit and implicit facial affect recognition in manic and depressed States of bipolar disorder: a functional magnetic resonance imaging study. *Biol Psychiatry*. 2006;59(1):31-39.
17. Jogia J, Haldane M, Cobb A, Kumari V, Frangou S. Pilot investigation of the changes in cortical activation during facial affect recognition with lamotrigine monotherapy in bipolar disorder. *Br J Psychiatry*. 2008;192(3):197-201.
18. Hassel S, Almeida JR, Kerr N, et al. Elevated striatal and decreased dorsolateral prefrontal cortical activity in response to emotional stimuli in euthymic bipolar disorder: no associations with psychotropic medication load. *Bipolar Disord*. 2008;10(8):916-927.
19. Killgore WDS, Gruber SA, Yurgelun-Todd DA. Abnormal corticostriatal activity during fear perception in bipolar disorder. *NeuroReport*. 2008;19(15):1523-1527. doi:10.1097/wnr.0b013e328310af58
20. Lagopoulos J, Malhi GS. A functional magnetic resonance imaging study of emotional Stroop in euthymic bipolar disorder. *Neuroreport*. 2007;18(15):1583-1587.
21. Abler B, Greenhouse I, Ongur D, Walter H, Heckers S. Abnormal reward system activation in mania. *Neuropsychopharmacology*. 2008;33(9):2217-2227.
22. Caseras X, Lawrence NS, Murphy K, Wise RG, Phillips ML. Ventral striatum activity in response to reward: differences between bipolar I and II disorders. *Am J Psychiatry*. 2013;170(5):533-541.
23. Chase HW, Nusslock R, Almeida JR, Forbes EE, LaBarbara EJ, Phillips ML. Dissociable patterns of abnormal frontal cortical activation during anticipation of an uncertain reward or loss in bipolar versus major depression. *Bipolar Disord*. 2013;15(8):839-854.
24. Frangou S, Kington J, Raymont V, Shergill SS. Examining ventral and dorsal prefrontal function in bipolar disorder: a functional magnetic resonance imaging study. *Eur Psychiatry*. 2008;23(4):300-308.
25. Jogia J, Dima D, Kumari V, Frangou S. Frontopolar cortical inefficiency may underpin reward and working memory dysfunction in bipolar disorder. *World J Biol Psychiatry*. 2012;13(8):605-615.
26. Kirschner M, Cathomas F, Manoliu A, et al. Shared and dissociable features of apathy and reward system dysfunction in bipolar I disorder and schizophrenia. *Psychol Med*. Published online April 17, 2019:1-12.
27. Manelis A, Stiffler R, Lockovich JC, Almeida JRC, Aslam HA, Phillips ML. Longitudinal changes in brain activation during anticipation of monetary loss in bipolar disorder. *Psychol Med*. 2019;49(16):2781-2788.
28. Mason L, O'Sullivan N, Montaldi D, Bentall RP, El-Deredy W. Decision-making and trait impulsivity in bipolar disorder are associated with reduced prefrontal regulation of striatal reward valuation. *Brain*. 2014;137(Pt 8):2346-2355.
29. Sharma A, Satterthwaite TD, Vandekar L, et al. Divergent relationship of depression severity to social reward responses among patients with bipolar versus unipolar depression. *Psychiatry Res Neuroimaging*. 2016;254:18-25.

30. Adler CM, Holland SK, Schmithorst V, Tuchfarber MJ, Strakowski SM. Changes in neuronal activation in patients with bipolar disorder during performance of a working memory task. *Bipolar Disord*. 2004;6(6):540-549.
31. Brooks JO 3rd, Vizueta N, Penfold C, Townsend JD, Bookheimer SY, Altshuler LL. Prefrontal hypoactivation during working memory in bipolar II depression. *Psychol Med*. 2015;45(8):1731-1740.
32. Deckersbach T, Rauch SL, Buhmann U, et al. An fMRI investigation of working memory and sadness in females with bipolar disorder: a brief report. *Bipolar Disorders*. 2008;10(8):928-942. doi:10.1111/j.1399-5618.2008.00633.x
33. Drapier D, Surguladze S, Marshall N, et al. Genetic liability for bipolar disorder is characterized by excess frontal activation in response to a working memory task. *Biol Psychiatry*. 2008;64(6):513-520.
34. Fernández-Corcuera P, Salvador R, Monté GC, et al. Bipolar depressed patients show both failure to activate and failure to de-activate during performance of a working memory task. *Journal of Affective Disorders*. 2013;148(2-3):170-178. doi:10.1016/j.jad.2012.04.009
35. Gruber O, Tost H, Henseler I, et al. Pathological amygdala activation during working memory performance: Evidence for a pathophysiological trait marker in bipolar affective disorder. *Hum Brain Mapp*. 2010;31(1):115-125.
36. Hamilton LS, Altshuler LL, Townsend J, et al. Alterations in functional activation in euthymic bipolar disorder and schizophrenia during a working memory task. *Hum Brain Mapp*. 2009;30(12):3958-3969.
37. Lagopoulos J, Ivanovski B, Malhi GS. An event-related functional MRI study of working memory in euthymic bipolar disorder. *J Psychiatry Neurosci*. 2007;32(3):174-184.
38. McKenna BS, Sutherland AN, Legenkaya AP, Eyler LT. Abnormalities of brain response during encoding into verbal working memory among euthymic patients with bipolar disorder. *Bipolar Disorders*. 2014;16(3):289-299. doi:10.1111/bdi.12126
39. Monks PJ, Thompson JM, Bullmore ET, et al. A functional MRI study of working memory task in euthymic bipolar disorder: evidence for task-specific dysfunction. *Bipolar Disorders*. 2004;6(6):550-564. doi:10.1111/j.1399-5618.2004.00147.x
40. Pomarol-Clotet E, Moro N, Sarró S, et al. Failure of de-activation in the medial frontal cortex in mania: evidence for default mode network dysfunction in the disorder. *The World Journal of Biological Psychiatry*. 2012;13(8):616-626. doi:10.3109/15622975.2011.573808
41. Pomarol-Clotet E, Alonso-Lana S, Moro N, et al. Brain functional changes across the different phases of bipolar disorder. *British Journal of Psychiatry*. 2015;206(2):136-144. doi:10.1192/bjp.bp.114.152033
42. Robinson JL, Bearden CE, Serap Monkul E, et al. Fronto-temporal dysregulation in remitted bipolar patients: an fMRI delayed-non-match-to-sample (DNMS) study. *Bipolar Disorders*. 2009;11(4):351-360. doi:10.1111/j.1399-5618.2009.00703.x
43. Wu G, Wang Y, Mwansisya TE, et al. Effective connectivity of the posterior cingulate and medial prefrontal cortices relates to working memory impairment in schizophrenic and bipolar patients. *Schizophrenia Research*. 2014;158(1-3):85-90. doi:10.1016/j.schres.2014.06.033

44. Rodríguez-Cano E, Alonso-Lana S, Sarró S, et al. Differential failure to deactivate the default mode network in unipolar and bipolar depression. *Bipolar Disorders*. 2017;19(5):386-395. doi:10.1111/bdi.12517
45. Goikolea JM, Dima D, Landín-Romero R, et al. Multimodal Brain Changes in First-Episode Mania: A Voxel-Based Morphometry, Functional Magnetic Resonance Imaging, and Connectivity Study. *Schizophrenia Bulletin*. 2019;45(2):464-473. doi:10.1093/schbul/sby047
46. Alonso-Lana S, Moro N, McKenna PJ, et al. Longitudinal brain functional changes between mania and euthymia in bipolar disorder. *Bipolar Disord*. 2019;21(5):449-457.
