# Supplementary material
Source: PubMed Central journal article supplement (PMC10061312)
Supplement: jamapsychiatry-e230131-s002.pdf [file jamapsychiatry-e230131-s002.pdf]

## Data Sharing Statement

Mesbah. Association Between the Fronto-Limbic Network and Cognitive and Emotional Functioning in Individuals With Bipolar Disorder. *JAMA Psychiatry*. Published March 29, 2023. doi:10.1001/jamapsychiatry.2023.0131

### Data

**Data available:** No

### Additional Information

**Explanation for why data not available:** The data that support the findings of this study are available on request from the corresponding author.
